# Supplementary material
Source: publisher site journal article supplement (https://www.dovepress.com/get_supplementary_file.php?f=216745-S7.xlsx)
Supplement: Supplementary file 1 [file get_supplementary_file.php]

## Sheet: Mutation_details
Table.S7 SNPs variation details associated with drug resistance genes
Reference	isolate	SNP_class	locus_tag	gene_id:gene_variations	start	end	Ref	End	Description	Amino acid variations
HRAB-85	MDR-CQA	nonsynonymous	BKJ37_RS06525	gene1295:c.A61G	1367707	1367707	A	G	AacA4 family aminoglycoside N(6')-acetyltransferase	I21V
	MDR-CQC	nonsynonymous	BKJ37_RS05635	gene1118:c.C343T	1218038	1218038	C	T	LysR family transcriptional regulator	H115Y
	MDR-CQF	nonsynonymous	BKJ37_RS06525	gene1295:c.A61G	1367707	1367707	A	G	AacA4 family aminoglycoside N(6')-acetyltransferase	I21V
	MDR-CQJ	nonsynonymous	BKJ37_RS09345	gene1851:c.C281T	1937970	1937970	G	A	two-component sensor histidine kinase AdeS	A94V
MDR-TJ	MDR-CQA	nonsynonymous	ABTJ_RS05640	gene1139:c.T731C	1196454	1196454	A	G	class C extended-spectrum beta-lactamase ADC-82	L244P
		nonsynonymous	ABTJ_RS18145	gene3681:c.G784A	3786478	3786478	C	T	ANT(3'')-II family aminoglycoside nucleotidyltransferase	A262T
		nonsynonymous	ABTJ_RS18145	gene3681:c.C616T	3786646	3786646	G	A	ANT(3'')-II family aminoglycoside nucleotidyltransferase	P206S
		nonsynonymous	ABTJ_RS18145	gene3681:c.T614A	3786648	3786648	A	T	ANT(3'')-II family aminoglycoside nucleotidyltransferase	M205K
		nonsynonymous	ABTJ_RS18145	gene3681:c.A403G	3786859	3786859	T	C	ANT(3'')-II family aminoglycoside nucleotidyltransferase	T135A
		nonsynonymous	ABTJ_RS18145	gene3681:c.A58G	3787204	3787204	T	C	ANT(3'')-II family aminoglycoside nucleotidyltransferase	K20E
	MDR-CQB	nonsynonymous	ABTJ_RS05640	gene1139:c.T731C	1196454	1196454	A	G	class C extended-spectrum beta-lactamase ADC-82	L244P
		nonsynonymous	ABTJ_RS18145	gene3681:c.G784A	3786478	3786478	C	T	ANT(3'')-II family aminoglycoside nucleotidyltransferase	A262T
		nonsynonymous	ABTJ_RS18145	gene3681:c.C616T	3786646	3786646	G	A	ANT(3'')-II family aminoglycoside nucleotidyltransferase	P206S
		nonsynonymous	ABTJ_RS18145	gene3681:c.T614A	3786648	3786648	A	T	ANT(3'')-II family aminoglycoside nucleotidyltransferase	M205K
		nonsynonymous	ABTJ_RS18145	gene3681:c.A403G	3786859	3786859	T	C	ANT(3'')-II family aminoglycoside nucleotidyltransferase	T135A
		nonsynonymous	ABTJ_RS18145	gene3681:c.A58G	3787204	3787204	T	C	ANT(3'')-II family aminoglycoside nucleotidyltransferase	K20E
	MDR-CQC	nonsynonymous	ABTJ_RS05970	gene1203:c.C343T	1272527	1272527	C	T	LysR family transcriptional regulator	H115Y
		nonsynonymous	ABTJ_RS18145	gene3681:c.G784A	3786478	3786478	C	T	ANT(3'')-II family aminoglycoside nucleotidyltransferase	A262T
		nonsynonymous	ABTJ_RS18145	gene3681:c.C616T	3786646	3786646	G	A	ANT(3'')-II family aminoglycoside nucleotidyltransferase	P206S
		nonsynonymous	ABTJ_RS18145	gene3681:c.T614A	3786648	3786648	A	T	ANT(3'')-II family aminoglycoside nucleotidyltransferase	M205K
		nonsynonymous	ABTJ_RS18145	gene3681:c.A403G	3786859	3786859	T	C	ANT(3'')-II family aminoglycoside nucleotidyltransferase	T135A
		nonsynonymous	ABTJ_RS18145	gene3681:c.A58G	3787204	3787204	T	C	ANT(3'')-II family aminoglycoside nucleotidyltransferase	K20E
	MDR-CQD	nonsynonymous	ABTJ_RS05640	gene1139:c.T731C	1196454	1196454	A	G	class C extended-spectrum beta-lactamase ADC-82	L244P
		nonsynonymous	ABTJ_RS18145	gene3681:c.G784A	3786478	3786478	C	T	ANT(3'')-II family aminoglycoside nucleotidyltransferase	A262T
		nonsynonymous	ABTJ_RS18145	gene3681:c.C616T	3786646	3786646	G	A	ANT(3'')-II family aminoglycoside nucleotidyltransferase	P206S
		nonsynonymous	ABTJ_RS18145	gene3681:c.T614A	3786648	3786648	A	T	ANT(3'')-II family aminoglycoside nucleotidyltransferase	M205K
		nonsynonymous	ABTJ_RS18145	gene3681:c.A403G	3786859	3786859	T	C	ANT(3'')-II family aminoglycoside nucleotidyltransferase	T135A
		nonsynonymous	ABTJ_RS18145	gene3681:c.A58G	3787204	3787204	T	C	ANT(3'')-II family aminoglycoside nucleotidyltransferase	K20E
	MDR-CQE	nonsynonymous	ABTJ_RS18145	gene3681:c.G784A	3786478	3786478	C	T	ANT(3'')-II family aminoglycoside nucleotidyltransferase	A262T
		nonsynonymous	ABTJ_RS18145	gene3681:c.C616T	3786646	3786646	G	A	ANT(3'')-II family aminoglycoside nucleotidyltransferase	P206S
		nonsynonymous	ABTJ_RS18145	gene3681:c.T614A	3786648	3786648	A	T	ANT(3'')-II family aminoglycoside nucleotidyltransferase	M205K
		nonsynonymous	ABTJ_RS18145	gene3681:c.A403G	3786859	3786859	T	C	ANT(3'')-II family aminoglycoside nucleotidyltransferase	T135A
		nonsynonymous	ABTJ_RS18145	gene3681:c.A58G	3787204	3787204	T	C	ANT(3'')-II family aminoglycoside nucleotidyltransferase	K20E
	MDR-CQF	nonsynonymous	ABTJ_RS18145	gene3681:c.G784A	3786478	3786478	C	T	ANT(3'')-II family aminoglycoside nucleotidyltransferase	A262T
		nonsynonymous	ABTJ_RS18145	gene3681:c.C616T	3786646	3786646	G	A	ANT(3'')-II family aminoglycoside nucleotidyltransferase	P206S
		nonsynonymous	ABTJ_RS18145	gene3681:c.T614A	3786648	3786648	A	T	ANT(3'')-II family aminoglycoside nucleotidyltransferase	M205K
		nonsynonymous	ABTJ_RS18145	gene3681:c.A403G	3786859	3786859	T	C	ANT(3'')-II family aminoglycoside nucleotidyltransferase	T135A
		nonsynonymous	ABTJ_RS18145	gene3681:c.A58G	3787204	3787204	T	C	ANT(3'')-II family aminoglycoside nucleotidyltransferase	K20E
	MDR-CQG	nonsynonymous	ABTJ_RS18145	gene3681:c.G784A	3786478	3786478	C	T	ANT(3'')-II family aminoglycoside nucleotidyltransferase	A262T
		nonsynonymous	ABTJ_RS18145	gene3681:c.C616T	3786646	3786646	G	A	ANT(3'')-II family aminoglycoside nucleotidyltransferase	P206S
		nonsynonymous	ABTJ_RS18145	gene3681:c.T614A	3786648	3786648	A	T	ANT(3'')-II family aminoglycoside nucleotidyltransferase	M205K
		nonsynonymous	ABTJ_RS18145	gene3681:c.A403G	3786859	3786859	T	C	ANT(3'')-II family aminoglycoside nucleotidyltransferase	T135A
	MDR-CQH	nonsynonymous	ABTJ_RS18145	gene3681:c.G784A	3786478	3786478	C	T	ANT(3'')-II family aminoglycoside nucleotidyltransferase	A262T
		nonsynonymous	ABTJ_RS18145	gene3681:c.C616T	3786646	3786646	G	A	ANT(3'')-II family aminoglycoside nucleotidyltransferase	P206S
		nonsynonymous	ABTJ_RS18145	gene3681:c.T614A	3786648	3786648	A	T	ANT(3'')-II family aminoglycoside nucleotidyltransferase	M205K
		nonsynonymous	ABTJ_RS18145	gene3681:c.A403G	3786859	3786859	T	C	ANT(3'')-II family aminoglycoside nucleotidyltransferase	T135A
		nonsynonymous	ABTJ_RS18145	gene3681:c.A58G	3787204	3787204	T	C	ANT(3'')-II family aminoglycoside nucleotidyltransferase	K20E
	MDR-CQI	nonsynonymous	ABTJ_RS18145	gene3681:c.G784A	3786478	3786478	C	T	ANT(3'')-II family aminoglycoside nucleotidyltransferase	A262T
		nonsynonymous	ABTJ_RS18145	gene3681:c.C616T	3786646	3786646	G	A	ANT(3'')-II family aminoglycoside nucleotidyltransferase	P206S
		nonsynonymous	ABTJ_RS18145	gene3681:c.T614A	3786648	3786648	A	T	ANT(3'')-II family aminoglycoside nucleotidyltransferase	M205K
		nonsynonymous	ABTJ_RS18145	gene3681:c.A403G	3786859	3786859	T	C	ANT(3'')-II family aminoglycoside nucleotidyltransferase	T135A
		nonsynonymous	ABTJ_RS18145	gene3681:c.A58G	3787204	3787204	T	C	ANT(3'')-II family aminoglycoside nucleotidyltransferase	K20E
	MDR-CQJ	nonsynonymous	ABTJ_RS09235	gene1866:c.C281T	1938321	1938321	G	A	two-component sensor histidine kinase AdeS	A94V
		nonsynonymous	ABTJ_RS18145	gene3681:c.G784A	3786478	3786478	C	T	ANT(3'')-II family aminoglycoside nucleotidyltransferase	A262T
		nonsynonymous	ABTJ_RS18145	gene3681:c.C616T	3786646	3786646	G	A	ANT(3'')-II family aminoglycoside nucleotidyltransferase	P206S
		nonsynonymous	ABTJ_RS18145	gene3681:c.T614A	3786648	3786648	A	T	ANT(3'')-II family aminoglycoside nucleotidyltransferase	M205K
		nonsynonymous	ABTJ_RS18145	gene3681:c.A403G	3786859	3786859	T	C	ANT(3'')-II family aminoglycoside nucleotidyltransferase	T135A
		nonsynonymous	ABTJ_RS18145	gene3681:c.A58G	3787204	3787204	T	C	ANT(3'')-II family aminoglycoside nucleotidyltransferase	K20E
MDR-ZJ06	MDR-CQA	nonsynonymous	ABZJ_RS13265	gene2681:c.C263T	2738087	2738087	C	T	QacE family quaternary ammonium compound efflux SMR transporter	T88I
		nonsynonymous	ABZJ_RS13820	gene2790:c.G543A	2869413	2869413	C	T	aldehyde dehydrogenase	M181I
	MDR-CQB	nonsynonymous	ABZJ_RS13265	gene2681:c.C263T	2738087	2738087	C	T	QacE family quaternary ammonium compound efflux SMR transporter	T88I
		stoploss	ABZJ_RS13795	gene2785:c.A615G	2863372	2863372	T	C	MarC family protein	X205W
	MDR-CQC	nonsynonymous	ABZJ_RS13265	gene2681:c.C263T	2738087	2738087	C	T	QacE family quaternary ammonium compound efflux SMR transporter	T88I
		nonsynonymous	ABZJ_RS13290	gene2686:c.C343T	2742152	2742152	G	A	LysR family transcriptional regulator	H115Y
		stoploss	ABZJ_RS13795	gene2785:c.A615G	2863372	2863372	T	C	MarC family protein	X205W
	MDR-CQD	nonsynonymous	ABZJ_RS13265	gene2681:c.C263T	2738087	2738087	C	T	QacE family quaternary ammonium compound efflux SMR transporter	T88I
		stoploss	ABZJ_RS13795	gene2785:c.A615G	2863372	2863372	T	C	MarC family protein	X205W
	MDR-CQE	nonsynonymous	ABZJ_RS13265	gene2681:c.C263T	2738087	2738087	C	T	QacE family quaternary ammonium compound efflux SMR transporter	T88I
	MDR-CQF	nonsynonymous	ABZJ_RS13265	gene2681:c.C263T	2738087	2738087	C	T	QacE family quaternary ammonium compound efflux SMR transporter	T88I
		nonsynonymous	ABZJ_RS13820	gene2790:c.G543A	2869413	2869413	C	T	aldehyde dehydrogenase	M181I
	MDR-CQG	nonsynonymous	ABZJ_RS13265	gene2681:c.C263T	2738087	2738087	C	T	QacE family quaternary ammonium compound efflux SMR transporter	T88I
		stoploss	ABZJ_RS13795	gene2785:c.A615G	2863372	2863372	T	C	MarC family protein	X205W
	MDR-CQH	nonsynonymous	ABZJ_RS13265	gene2681:c.C263T	2738087	2738087	C	T	QacE family quaternary ammonium compound efflux SMR transporter	T88I
		nonsynonymous	ABZJ_RS13855	gene2796:c.T115G	2878274	2878274	T	G	amino acid permease	C39G
		nonsynonymous	ABZJ_RS13860	gene2797:c.T11A	2881992	2881992	A	T	methylmalonate-semialdehyde dehydrogenase (CoA acylating)	I4N
	MDR-CQI	nonsynonymous	ABZJ_RS13265	gene2681:c.C263T	2738087	2738087	C	T	QacE family quaternary ammonium compound efflux SMR transporter	T88I
	MDR-CQJ	nonsynonymous	ABZJ_RS09930	gene2005:c.C281T	2079316	2079316	C	T	two-component sensor histidine kinase AdeS	A94V
		nonsynonymous	ABZJ_RS13265	gene2681:c.C263T	2738087	2738087	C	T	QacE family quaternary ammonium compound efflux SMR transporter	T88I
		stoploss	ABZJ_RS13795	gene2785:c.A615G	2863372	2863372	T	C	MarC family protein	X205W

## Sheet: SNP_statistics
SNP statistics
ref	isolate	SNP mutation statistics
		Count	Non Synonymous	Synonymous	Stoploss
HRAB-85	MDR-CQA	3	1	2	0
	MDR-CQB	1	0	1	0
	MDR-CQC	2	1	1	0
	MDR-CQD	1	0	1	0
	MDR-CQE	1	0	1	0
	MDR-CQF	5	1	4	0
	MDR-CQG	1	0	1	0
	MDR-CQH	0	0	0	0
	MDR-CQI	1	0	1	0
	MDR-CQJ	2	1	1	0
MDR-TJ	MDR-CQA	19	5	14	0
	MDR-CQB	20	6	14	0
	MDR-CQC	20	6	14	0
	MDR-CQD	20	6	14	0
	MDR-CQE	19	5	14	0
	MDR-CQF	19	5	14	0
	MDR-CQG	18	4	14	0
	MDR-CQH	19	5	14	0
	MDR-CQI	19	5	14	0
	MDR-CQJ	20	6	14	0
MDR-ZJ06	MDR-CQA	3	2	1	0
	MDR-CQB	3	1	2	0
	MDR-CQC	4	2	1	1
	MDR-CQD	4	1	2	1
	MDR-CQE	2	1	1	0
	MDR-CQF	3	2	1	0
	MDR-CQG	4	1	2	1
	MDR-CQH	3	3	0	0
	MDR-CQI	2	1	1	0
	MDR-CQJ	4	2	4	1
